# Supplementary material
Source: HighWire-hosted journal article supplement (http://ajnr-stage2.highwire.org/highwire/filestream/52596/field_highwire_adjunct_files/0/0774_Movie_Legends.pdf)
Supplement: 0774_Movie_Legends.pdf [file 0774_Movie_Legends.pdf]

## SUPPLEMENTAL MATERIAL

**Movies 1-4:** Time-resolved 3D pathlines for AVM-13 (SMG=1), AVM-12 (SMG=2), AVM-17 (SMG=3), and AVM-14 (SMG=4), illustrating the temporal evolution of blood flow in the entire intracranial vasculature over one cardiac cycle for AVMs with varying SMGs. The pathlines show complex AVM arterial feeding and venous draining flow patterns and also reflect dynamic changes of regional blood flow velocities in different vascular territories over the cardiac cycle (red and yellow for high velocities; blue and green for low velocities).
